# Supplementary material
Source: HighWire-hosted journal article supplement (http://cmajopen.ca/highwire/filestream/81067/field_highwire_adjunct_files/0/2017-0109-1-at.pdf)
Supplement: 2017-0109-1-at.pdf [file 2017-0109-1-at.pdf]

# SOFT Movement Survey of FMT Programs

---

## Part 1: General Information about your Fecal Microbiota Transplant (FMT) Program

### 1) Please fill out the information below:

First Name: \_\_\_\_\_

Last Name: \_\_\_\_\_

Title: \_\_\_\_\_

Please enter an email address we can use to communicate with you.:

\_\_\_\_\_

Please fill out the start date of this survey below.:

\_\_\_\_\_

### 2) Please enter the name of the institution and city where your FMT program is based:

Institution name: \_\_\_\_\_

City: \_\_\_\_\_

### 3) Have you begun performing FMTs at your location?

Yes

No

### 4) Approximately what year did you start performing FMT? If you have not, what year do you anticipate you will be starting to perform FMTs?

Please enter year: \_\_\_\_\_

Not applicable

### 5) If applicable, please enter the number of FMTs performed since the program started? If not applicable, please enter 0 (zero).

\_\_\_\_\_

**6) Have you performed FMT in the context of a research study, for clinical care or both?**

- Research only
- Clinical care only
- Both

**7) Which approvals or endorsements did you require before starting your FMT program (check all that apply):**

- Medical Advisory Committee
- Hospital Senior Administrators
- Research Ethics Board
- Other (please specify): \_\_\_\_\_

**8) Approximately how long does it take for a patient to get a FMT from initial clinical assessment to first administration?**

- < 1 week
- 1-4 weeks
- 4-12 weeks
- >12 weeks

**9) Aside from the persons who manufacture and administer FMT, who else supports the program and in what capacity (select all that apply and please list duties below)?**

- Coordinator: \_\_\_\_\_
- Clinical nurse: \_\_\_\_\_
- Research nurse: \_\_\_\_\_
- Trainee MD: \_\_\_\_\_
- Students: \_\_\_\_\_
- Volunteers: \_\_\_\_\_
- Other (please specify): \_\_\_\_\_
- Not applicable

---

## Part 2: Donor Selection and Screening

**10) Please attach your Standard Operating Procedures for FMT donor screening (if available) below.**

Please attach on web survey

**11) Do you use universal FMT donors?**

Yes

No

**12) If you use universal FMT donors, how often do you screen them?**

Every month

Every 2 months

Every 3 months

Every 4 months

Every 5 months

Every 6 months

I do not use universal donors

Other (please specify): \_\_\_\_\_

**13) If you do not use universal FMT donors, when do you perform donor screening?**

Within 2 weeks of donation for FMT

Within 4 weeks of donation for FMT

Within 3 months of donation for FMT

Within 6 months of donation for FMT

Other (please specify): \_\_\_\_\_

**14) Do you perform microbiota analysis of donor feces?**

Yes

No

**15) If you perform microbiota analysis of donor feces, do you use this as part of your selection criteria for choosing donors?**

- Yes
- No
- Not applicable

**16) Which of the following agents suggested by Health Canada do you use as exclusion criteria when screening donors for FMT?**

- Systemic immunosuppressive or biological agents
- Systemic antineoplastic agents
- Exogenous glucocorticoids
- Anti-diarrheal drugs
- Mineral oil
- Bismuth
- Magnesium
- Kaolin
- Recent use of antibiotics (if yes, please specify your definition of recent use):  
\_\_\_\_\_
- All of the above

**17) Do you screen for additional agents not included in Health Canada's suggestions?**

- Yes (please specify): \_\_\_\_\_
- No

**18) Which of the following microorganisms or diseases suggested by Health Canada do you use as exclusion criteria routinely in FMT donors? (Enter all that apply)**

- Cancer
- Salmonella* species
- Shigella*
- Campylobacter*
- Sorbitol-negative *Escherichia coli* 0157-H7
- Shiga toxin
- Yersinia*
- Plesiomonas*
- Aeromonas*
- Vibrio*
- Listeria*
- Helicobacter pylori*
- Clostridium difficile*
- Vancomycin-resistant *enterococci* (VRE)
- Methicillin-resistant *Staphylococcus aureus* (MRSA)
- Syphilis
- Neisseria gonorrhoea*
- Chlamydia trachomatis*
- Norovirus
- Rotavirus
- Adenovirus
- HIV 1/2
- HTLV-I/II
- Hepatitis B/C
- Ova and parasites
- Malaria
- Chagas disease
- Babesiosis
- Creutzfeldt-Jakob disease
- Prion-related diseases from dural mater grafts
- All of the above

19) What screening modality do you use to screen for the above microorganisms/diseases?

|                                                   | Risk factors             | Medical assessment       | Laboratory test             |                       |                                       | Test type<br>(please enter below if applicable) |
|---------------------------------------------------|--------------------------|--------------------------|-----------------------------|-----------------------|---------------------------------------|-------------------------------------------------|
|                                                   | Risk factors             | Medical assessment       | Test performed at your site | Test performed at PHL | Test performed at site other than PHL |                                                 |
| <i>Salmonella</i> species                         | <input type="checkbox"/> | <input type="checkbox"/> | ___                         | ___                   | ___                                   | ___                                             |
| <i>Shigella</i>                                   | <input type="checkbox"/> | <input type="checkbox"/> | ___                         | ___                   | ___                                   | ___                                             |
| <i>Campylobacter</i>                              | <input type="checkbox"/> | <input type="checkbox"/> | ___                         | ___                   | ___                                   | ___                                             |
| Sorbitol-negative <i>Escherichia coli</i> 0157-H7 | <input type="checkbox"/> | <input type="checkbox"/> | ___                         | ___                   | ___                                   | ___                                             |
| Shiga toxin                                       | <input type="checkbox"/> | <input type="checkbox"/> | ___                         | ___                   | ___                                   | ___                                             |
| <i>Yersinia</i>                                   | <input type="checkbox"/> | <input type="checkbox"/> | ___                         | ___                   | ___                                   | ___                                             |
| <i>Plesiomonas</i>                                | <input type="checkbox"/> | <input type="checkbox"/> | ___                         | ___                   | ___                                   | ___                                             |
| <i>Aeromonas</i>                                  | <input type="checkbox"/> | <input type="checkbox"/> | ___                         | ___                   | ___                                   | ___                                             |
| <i>Vibrio</i>                                     | <input type="checkbox"/> | <input type="checkbox"/> | ___                         | ___                   | ___                                   | ___                                             |
| <i>Listeria</i>                                   | <input type="checkbox"/> | <input type="checkbox"/> | ___                         | ___                   | ___                                   | ___                                             |
| <i>Helicobacter pylori</i>                        | <input type="checkbox"/> | <input type="checkbox"/> | ___                         | ___                   | ___                                   | ___                                             |
| <i>Clostridium difficile</i>                      | <input type="checkbox"/> | <input type="checkbox"/> | ___                         | ___                   | ___                                   | ___                                             |
| Vancomycin-resistant enterococci (VRE)            | <input type="checkbox"/> | <input type="checkbox"/> | ___                         | ___                   | ___                                   | ___                                             |
| Methicillin-resistant <i>Staphylococcus</i>       | <input type="checkbox"/> | <input type="checkbox"/> | ___                         | ___                   | ___                                   | ___                                             |

|                                                |                          |                          |                          |                          |                          |                          |
|------------------------------------------------|--------------------------|--------------------------|--------------------------|--------------------------|--------------------------|--------------------------|
| <i>aureus</i><br>(MRSA)                        |                          |                          |                          |                          |                          |                          |
| Syphilis                                       | <input type="checkbox"/> | <input type="checkbox"/> | <input type="checkbox"/> | <input type="checkbox"/> | <input type="checkbox"/> | <input type="checkbox"/> |
| <i>Neisseria gonorrhoea</i>                    | <input type="checkbox"/> | <input type="checkbox"/> | <input type="checkbox"/> | <input type="checkbox"/> | <input type="checkbox"/> | <input type="checkbox"/> |
| <i>Chlamydia trachomatis</i>                   | <input type="checkbox"/> | <input type="checkbox"/> | <input type="checkbox"/> | <input type="checkbox"/> | <input type="checkbox"/> | <input type="checkbox"/> |
| Norovirus                                      | <input type="checkbox"/> | <input type="checkbox"/> | <input type="checkbox"/> | <input type="checkbox"/> | <input type="checkbox"/> | <input type="checkbox"/> |
| Rotavirus                                      | <input type="checkbox"/> | <input type="checkbox"/> | <input type="checkbox"/> | <input type="checkbox"/> | <input type="checkbox"/> | <input type="checkbox"/> |
| Adenovirus                                     | <input type="checkbox"/> | <input type="checkbox"/> | <input type="checkbox"/> | <input type="checkbox"/> | <input type="checkbox"/> | <input type="checkbox"/> |
| HIV 1/2                                        | <input type="checkbox"/> | <input type="checkbox"/> | <input type="checkbox"/> | <input type="checkbox"/> | <input type="checkbox"/> | <input type="checkbox"/> |
| HTLV-I/II                                      | <input type="checkbox"/> | <input type="checkbox"/> | <input type="checkbox"/> | <input type="checkbox"/> | <input type="checkbox"/> | <input type="checkbox"/> |
| Hepatitis B/C                                  | <input type="checkbox"/> | <input type="checkbox"/> | <input type="checkbox"/> | <input type="checkbox"/> | <input type="checkbox"/> | <input type="checkbox"/> |
| Ova and parasites                              | <input type="checkbox"/> | <input type="checkbox"/> | <input type="checkbox"/> | <input type="checkbox"/> | <input type="checkbox"/> | <input type="checkbox"/> |
| Malaria                                        | <input type="checkbox"/> | <input type="checkbox"/> | <input type="checkbox"/> | <input type="checkbox"/> | <input type="checkbox"/> | <input type="checkbox"/> |
| Chagas disease                                 | <input type="checkbox"/> | <input type="checkbox"/> | <input type="checkbox"/> | <input type="checkbox"/> | <input type="checkbox"/> | <input type="checkbox"/> |
| Babesiosis                                     | <input type="checkbox"/> | <input type="checkbox"/> | <input type="checkbox"/> | <input type="checkbox"/> | <input type="checkbox"/> | <input type="checkbox"/> |
| Creutzfeldt-Jakob disease                      | <input type="checkbox"/> | <input type="checkbox"/> | <input type="checkbox"/> | <input type="checkbox"/> | <input type="checkbox"/> | <input type="checkbox"/> |
| Prion-related diseases from dural mater grafts | <input type="checkbox"/> | <input type="checkbox"/> | <input type="checkbox"/> | <input type="checkbox"/> | <input type="checkbox"/> | <input type="checkbox"/> |
| Cancer                                         | <input type="checkbox"/> | <input type="checkbox"/> | <input type="checkbox"/> | <input type="checkbox"/> | <input type="checkbox"/> | <input type="checkbox"/> |

**20) Do you screen for any additional microorganisms or diseases not included by Health Canada suggestions?**

Yes (please specify): \_\_\_\_\_

No

**21) Do you collect a dietary history of FMT donors in the event recipients have food allergies?**

Yes

No

---

### **Part 3: FMT Manufacturing**

**22) Please attach your Standard Operating Procedures for FMT manufacturing (if available) below.**

Please attach on web survey

**23) Where is FMT manufactured in your centre (select more than one if applies)?**

Clinical microbiology laboratory

Research laboratory

Pharmacy

Clinic

Other (please specify)

**24) Who manufactures FMT (select all that apply)?**

MD

Trainee MD

Clinical nurse

Research nurse

Laboratory technologist

Clinical microbiology technologist/technician

Research technologist/technician

Other (please specify): \_\_\_\_\_



**25) Approximately what mass of donor stool do you use for each FMT (please select all that apply)?**

|                         | 10g                      | 20g                      | 30g                      | 40g                      | 50g                      | 100g                     | 150g                     | Other amount (please enter below) |
|-------------------------|--------------------------|--------------------------|--------------------------|--------------------------|--------------------------|--------------------------|--------------------------|-----------------------------------|
| Enema                   | <input type="checkbox"/> | <input type="checkbox"/> | <input type="checkbox"/> | <input type="checkbox"/> | <input type="checkbox"/> | <input type="checkbox"/> | <input type="checkbox"/> | ___                               |
| Colonoscopy             | <input type="checkbox"/> | <input type="checkbox"/> | <input type="checkbox"/> | <input type="checkbox"/> | <input type="checkbox"/> | <input type="checkbox"/> | <input type="checkbox"/> | ___                               |
| Nasogastric/nasojejunal | <input type="checkbox"/> | <input type="checkbox"/> | <input type="checkbox"/> | <input type="checkbox"/> | <input type="checkbox"/> | <input type="checkbox"/> | <input type="checkbox"/> | ___                               |

**26) Approximately what volume of diluent do you use for each FMT (check all that apply if more than one route of administration at your center)?**

|                         | 25mL                     | 50mL                     | 100mL                    | 150mL                    | 200mL                    | 300mL                    | 400mL                    | 500mL                    | Other amount (please enter below) |
|-------------------------|--------------------------|--------------------------|--------------------------|--------------------------|--------------------------|--------------------------|--------------------------|--------------------------|-----------------------------------|
| Enema                   | <input type="checkbox"/> | <input type="checkbox"/> | <input type="checkbox"/> | <input type="checkbox"/> | <input type="checkbox"/> | <input type="checkbox"/> | <input type="checkbox"/> | <input type="checkbox"/> | ___                               |
| Colonoscopy             | <input type="checkbox"/> | <input type="checkbox"/> | <input type="checkbox"/> | <input type="checkbox"/> | <input type="checkbox"/> | <input type="checkbox"/> | <input type="checkbox"/> | <input type="checkbox"/> | ___                               |
| Nasogastric/nasojejunal | <input type="checkbox"/> | <input type="checkbox"/> | <input type="checkbox"/> | <input type="checkbox"/> | <input type="checkbox"/> | <input type="checkbox"/> | <input type="checkbox"/> | <input type="checkbox"/> | ___                               |

**27) What type of diluent do you use for FMT?**

Tap water

Sterile water

Sterile normal saline

Other (please specify): \_\_\_\_\_

**28) What form of FMT do you manufacture (select all that apply)?**

- Fresh
- Frozen
- Capsules
- Lyophilized (freeze-dried)
- Other (please specify): \_\_\_\_\_

**29) What are your recommended storage conditions for donor feces prior to FMT manufacturing?**

- Household freezer
- Household fridge
- Room temperature
- Other (please specify): \_\_\_\_\_

**30) How long do you allow donor feces to be stored prior to delivery to your unit for FMT manufacturing?**

- Up to 24 hour
- Up to 48 hour
- Up to 72 hour
- Other (please specify): \_\_\_\_\_

**31) What storage conditions for donor feces do you use after receiving donor feces for FMT manufacturing?**

- Room temperature
- 4-5C
- 20C
- 80C
- Other (please specify): \_\_\_\_\_

**32) How long do you allow donor feces to be stored in your unit before manufacturing for FMT?**

- A few hours
- A few hours to 24 hours
- 24-48 hours
- 48-72 hours
- Other (please specify): \_\_\_\_\_

**33) If you use frozen FMT, which cryoprotectant do you use?**

- Glycerol (please enter concentration in final FMT):  
\_\_\_\_\_
- Other (please specify): \_\_\_\_\_
- No cryoprotectant
- Not applicable

**34) If you use frozen FMT, at what temperature is the sample frozen?**

- 20C
- 80C
- Other (please specify): \_\_\_\_\_
- Not applicable

**35) What is the maximum acceptable time from FMT donation to patient administration in your institution?**

- 3 hours
- 6 hours
- 12 hours
- 24 hours
- 48 hours
- 96 hours
- >96 hours
- Not applicable

**36) Did you undertake any manufacturing validation studies prior to starting your FMT program?**

- Yes
- No

**37) What are your rejection criteria for donor stools at the time of donation (select all that apply)?**

- Clinical criteria only (donor has active fever, diarrhea etc.)
- Unformed stool provided for donation
- Urine mixed in donated stools
- Mucous in donated stools
- Insufficient quantity of donated stools
- Blood in donated stools (if so, do you do Fecal Occult Blood Testing?):

\_\_\_\_\_

Other (please specify): \_\_\_\_\_

---

#### **Part 4: Good Manufacturing/Biosafety Procedures**

**38) Do you manufacture FMT in a biosafety cabinet?**

- Yes
- No

**39) How do you disinfect your manufacturing equipment (select all that apply)?**

- Disinfect with sporicidal agent pre- and post-FMT
- Disinfect with non-sporicidal disinfectant pre- and post-FMT
- Use only disposable equipment for all manufacturing steps
- Other (please specify)

**40) What personal protective equipment is used by the FMT manufacturer (select all that apply)?**

- Single pair of gloves
  - Double gloves
  - Fluid-resistant gown
  - Non-fluid-resistant gown
  - Procedure mask
  - Face shield
  - Hair coverings
  - Shoe protection
  - Other (please specify): \_\_\_\_\_
- 

**Part 5: Patients**

**41) For which of the follow conditions do you administer FMT?**

- Clostridium difficile* infection
- Inflammatory bowel disease
- Irritable bowel syndrome
- Other (please specify): \_\_\_\_\_

**42) To which of the following subgroups of *Clostridium difficile* infection (CDI) do you administer FMT (select all that apply)?**

- Initial episode of CDI as part of treatment for acute disease or immediately thereafter (ie. within 2 weeks of symptom-onset)
- First recurrent CDI episode as part of treatment for acute disease or immediately thereafter (ie. within 2 weeks of symptom-onset)
- Second or greater recurrent CDI episode(s) as part of treatment for acute disease or immediately thereafter (ie. within 2 weeks of symptom-onset)
- Patients with a history of recurrent CDI after they have been treated and are asymptomatic off therapy (i.e. beyond 2 weeks of symptom onset)
- Patients with a history of recurrent CDI on chronic suppressive oral vancomycin
- Patients with CDI who are unresponsive to antimicrobial treatment
- Critically-ill patients with CDI

- Immunocompromised patients with CDI
- Those with concurrent underlying GI disease with CDI
- Other (please specify): \_\_\_\_\_
- Not applicable

**43) What are your major exclusion criteria for FMT receipt (select all that apply)?**

- Age over 90 years
  - Immunocompromised status
  - Bleeding disorder (i.e. irreversible)
  - Severe, uncontrollable diarrhea
  - Bloody diarrhea
  - Other (please specify): \_\_\_\_\_
- 

**Part 6: Clinical Procedures for FMT Administration**

**44) Please attach your Standard Operating Procedures for FMT administration (if available) below.**

Please attach on web survey

**45) Where do you perform FMT (select all that apply)?**

- Clinic room
- Day unit
- Inpatient room
- Outside of hospital
- Other (please specify): \_\_\_\_\_

**46) Who administers FMT to patients (select all that apply)?**

- MD
- Trainee MD
- Nurse
- Other (please specify): \_\_\_\_\_

**47) How long before FMT do you stop oral vancomycin (or other antibiotic) if a patient is on treatment/suppression?**

- <24 hours
- 24-48 hours
- 48-96 hours
- >96 hours
- Not applicable

**48) What route(s) of administration do you use for FMT?**

- Enema
- Colonoscopy
- Nasogastric/nasojejunal tube
- Other (please specify): \_\_\_\_\_

**49) On average, how long does the FMT procedure take?**

|                         | <10minutes               | 10-30 minutes            | 30-60 minutes            | >60 minutes              | Not applicable           |
|-------------------------|--------------------------|--------------------------|--------------------------|--------------------------|--------------------------|
| Enema                   | <input type="checkbox"/> | <input type="checkbox"/> | <input type="checkbox"/> | <input type="checkbox"/> | <input type="checkbox"/> |
| Colonoscopy             | <input type="checkbox"/> | <input type="checkbox"/> | <input type="checkbox"/> | <input type="checkbox"/> | <input type="checkbox"/> |
| Nasogastric/nasojejunal | <input type="checkbox"/> | <input type="checkbox"/> | <input type="checkbox"/> | <input type="checkbox"/> | <input type="checkbox"/> |

**50) How many FMTs do you perform per patient?**

|             | Only 1                   | Up to 3                  | Up to 5                  | >5 if necessary          | Not applicable           |
|-------------|--------------------------|--------------------------|--------------------------|--------------------------|--------------------------|
| Enema       | <input type="checkbox"/> | <input type="checkbox"/> | <input type="checkbox"/> | <input type="checkbox"/> | <input type="checkbox"/> |
| Colonoscopy | <input type="checkbox"/> | <input type="checkbox"/> | <input type="checkbox"/> | <input type="checkbox"/> | <input type="checkbox"/> |

|                         |                          |                          |                          |                          |                          |
|-------------------------|--------------------------|--------------------------|--------------------------|--------------------------|--------------------------|
| Nasogastric/nasojejunal | <input type="checkbox"/> | <input type="checkbox"/> | <input type="checkbox"/> | <input type="checkbox"/> | <input type="checkbox"/> |
|-------------------------|--------------------------|--------------------------|--------------------------|--------------------------|--------------------------|

**51) If you administer multiple FMTs per patient, what is the frequency of FMT?**

|                         | Daily                    | Every 2-4 days           | Every 4-7 days           | Weekly                   | Every 10-14 days         | Other (please enter a value below) | Not applicable           |
|-------------------------|--------------------------|--------------------------|--------------------------|--------------------------|--------------------------|------------------------------------|--------------------------|
| Enema                   | <input type="checkbox"/> | <input type="checkbox"/> | <input type="checkbox"/> | <input type="checkbox"/> | <input type="checkbox"/> | ___                                | <input type="checkbox"/> |
| Colonoscopy             | <input type="checkbox"/> | <input type="checkbox"/> | <input type="checkbox"/> | <input type="checkbox"/> | <input type="checkbox"/> | ___                                | <input type="checkbox"/> |
| Nasogastric/nasojejunal | <input type="checkbox"/> | <input type="checkbox"/> | <input type="checkbox"/> | <input type="checkbox"/> | <input type="checkbox"/> | ___                                | <input type="checkbox"/> |

**52) What are your criteria for failure of FMT?**

- Return of CDI symptoms
- Return of CDI symptoms and laboratory confirmation
- Other (please specify): \_\_\_\_\_

**53) What is your routine follow-up post-FMT?**

- I only see post-FMT patient's as needed, if they have concerns
- I see post-FMT patients regularly, at the following time points (other please specify)::  
\_\_\_\_\_

**54) Do you perform microbiota analysis of FMT recipient feces prior to FMT administration?**

- Yes
- No

**55) Do you perform microbiota analysis of FMT recipient feces following FMT administration?**



- Yes (please specify frequency): \_\_\_\_\_
- No

---

## **Part 7: Infection Control Procedures**

### **56) What personal protective equipment is worn by the individual administering FMT (select all that apply)?**

- Single pair of gloves
- Double gloves
- Fluid-resistant gown
- Non-fluid-resistant gown
- Procedure mask
- Face shield
- Hair coverings
- Shoe protection
- Other (please specify): \_\_\_\_\_

### **57) How is the FMT procedure room/area disinfected between FMTs, if multiple FMTs are scheduled back to back?**

- I never have more than one FMT in a day
- Wipe down with non-sporicidal hospital disinfectant by FMT team
- Wipe down with sporicidal disinfectant by FMT team
- Cleaning by housekeeping staff using non-sporicidal hospital disinfectant
- Cleaning by housekeeping staff using sporicidal disinfectant
- Other (please specify): \_\_\_\_\_

### **58) How is the FMT procedure room/area disinfected after FMT procedures are done for the day?**

- Wipe down with non-sporicidal disinfectant by FMT team
- Wipe down with sporicidal disinfectant by FMT team
- Cleaning by housekeeping staff using non-sporicidal disinfectant
- Cleaning by housekeeping staff using sporicidal disinfectant

( ) Other (please specify): \_\_\_\_\_

---

**Remarks**

**59) Do you have any other questions/comments/concerns to share?**

---

---

---

---

---

**Thank You!**
